# Supplementary material
Source: Elsevier journal article supplement (https://www.sciencedirect.com/science/article/pii/S0211563818301251)
Supplement: mmc1 [file S0211563818301251:mmc1.pdf]

## Anexo 1. Estrategias de búsqueda

| Bases            | Búsqueda                                                                                                                                                                                                                                                                                                                                                                                                                                                                              | Resultados |
|------------------|---------------------------------------------------------------------------------------------------------------------------------------------------------------------------------------------------------------------------------------------------------------------------------------------------------------------------------------------------------------------------------------------------------------------------------------------------------------------------------------|------------|
| Medline/pubmed   | ((("Infant"[Mesh] AND "Down Syndrome"[Mesh] AND "Exercise"[Mesh] AND "Walking"[Mesh])) OR (("child" [tw] OR infant* [tw] OR pediatric [tw] OR "new walkers" [tw] OR children [tw]) AND ("down syndrome" [tw] OR "trisomy 21" [tw]) AND (treadmill [tw]) AND (walking [tw] OR stepping [tw] OR gait [tw])) AND random*                                                                                                                                                                 | 14         |
| •Lilacs          | Tw:(((("child" OR infant* OR "pediatric" OR "new walkers" OR "children") AND ("down syndrome" OR "trisomy 21") AND treadmill AND ("stepping" OR "walking" OR gait))) OR Mh:("Walking" AND "infant" AND "Down Syndrome" AND "Exercise")                                                                                                                                                                                                                                                | 0          |
| lbecs            | Tw:(((("child" OR infant* OR "pediatric" OR "new walkers" OR "children") AND ("down syndrome" OR "trisomy 21") AND treadmill AND ("stepping" OR "walking" OR gait))) OR Mh:("Walking" AND "infant" AND "Down Syndrome" AND "Exercise")                                                                                                                                                                                                                                                | 0          |
| EBSCO            | TI ((child OR infant* OR pediatric OR "new walkers" OR children) AND ("down syndrome" OR "trisomy 21") AND treadmill AND (stepping OR walking OR gait)) OR AB ((child OR infant* OR pediatric OR "new walkers" OR children) AND ("down syndrome" OR "trisomy 21") AND treadmill AND (stepping OR walking OR gait)) OR MH (walking AND infant AND "down syndrome" AND exercise)                                                                                                        | 95         |
| Web of Scienzie  | TS=((child OR infant* OR pediatric OR "new walkers" OR children) AND ("down syndrome" OR "trisomy 21") AND treadmill AND (stepping OR walking OR gait))                                                                                                                                                                                                                                                                                                                               | 79         |
| Scielo           | TS=((child OR infant* OR pediatric OR "new walkers" OR children) AND ("down syndrome" OR "trisomy 21") AND treadmill AND (stepping OR walking OR gait))                                                                                                                                                                                                                                                                                                                               | 1          |
| Cochrane library | #1 child or infant* or pediatric or "new walkers" or children 145919<br>#2 "down syndrome" or "trisomy 21" 750<br>#3 treadmill 5857<br>#4 stepping or walking or gait 16971<br>#5 MeSH descriptor: [Walking] explode all trees 4913<br>#6 MeSH descriptor: [Infant] explode all trees 15843<br>#7 MeSH descriptor: [Down Syndrome] explode all trees 373<br>#8 MeSH descriptor: [Exercise] explode all trees 20852<br>#9 (#1 and #2 and #3 and #4) or (#5 and #6 and #7 and #8)<br>13 | 9          |
