# Supplementary material
Source: Elsevier journal article supplement (https://www.sciencedirect.com/science/article/pii/S0211563818301251)
Supplement: mmc3 [file S0211563818301251:mmc3.pdf]

### Anexo 3. Conducta de los estudios.

| Artículos                           | 1  | 2  | 3  | 4  | 5  | 6  | 7  | Evidencia/Conducta |
|-------------------------------------|----|----|----|----|----|----|----|--------------------|
| Ulrich et al. <sup>11</sup>         | Si | Si | Si | No | Si | No | No | II / M (4/7)       |
| Angulo-Barroso et al. <sup>13</sup> | Si | Si | Si | No | Si | Si | No | II / M (5/7)       |
| Angulo-Barroso et al. <sup>14</sup> | Si | Si | No | No | Si | Si | No | II / M (4/7)       |
| Wu et al. <sup>17</sup>             | Si | Si | Si | No | Si | Si | No | II / M (5/7)       |
| Ulrich et al. <sup>15</sup>         | Si | Si | Si | No | Si | No | No | II / M (4/7)       |
| Lloyd et al. <sup>12</sup>          | Si | Si | No | No | Si | No | No | II / D (3/7)       |
| Wu et al. <sup>16</sup>             | Si | Si | Si | No | Si | Si | No | II / M (5/7)       |

(M): moderada; (D): débil

#### Preguntas de la conducta

1. ¿Los criterios de inclusión y exclusión de la población del estudio estaban bien descritos y seguidos?
2. ¿Se describió bien la intervención y hubo adherencia a la asignación de la intervención? (para los diseños de 2 grupos, ¿la exposición al control también fue bien descrita?) Ambas partes de la pregunta deben cumplirse para obtener un puntaje de "sí".
3. ¿Las medidas utilizadas fueron claramente descritas, válidas y confiables para medir los resultados de interés?
4. El evaluador de resultados desconocía el estado de intervención de los participantes (es decir, estaban enmascarados los evaluadores)
5. ¿Los autores realizaron e informaron la evaluación estadística apropiada, incluidos los cálculos de poder estadístico? Ambas partes de la pregunta deben cumplirse para obtener un "sí".
6. Se informó de abandono / pérdida durante el seguimiento y menos del 20%? Para los diseños de 2 grupos, ¿se equilibró la deserción?  
Considerando el potencial dentro del diseño del estudio, ¿se usaron métodos apropiados para controlar las variables de confusión y limitar los sesgos potenciales?
